# Supplementary material
Source: PubMed Central journal article supplement (PMC10810098)
Supplement: media-1.pdf [file media-1.pdf]

**Supplementary Note 1:** Installation of kallisto and bustools from source or installation of specific versions of the software.

### Installing kallisto and bustools from source

kallisto (version 0.50.1):

```
git clone --branch v0.50.1 https://github.com/pachterlab/kallisto
cd kallisto
mkdir build
cd build
cmake ..
make
make install
```

bustools (version 0.43.1):

```
git clone --branch v0.43.1 https://github.com/BUStools/bustools
cd bustools
mkdir build
cd build
cmake ..
make
make install
```

Note: The `--branch` argument can be omitted to install the latest version of the software.

### Using kb\_python with kallisto and bustools installed from source

kb\_python can be run with compiled binaries by supplying the paths to the binaries as follows:

```
kb ref --kallisto=/path/to/kallisto --bustools=/path/to/bustools ...
```

```
kb count --kallisto=/path/to/kallisto --bustools=/path/to/bustools ...
```

### Installing a specific version of kb\_python

A specific version of kb\_python (e.g. version 0.28.0) can be installed as follows:

```
pip install kb_python==0.28.0
```

## Supplementary Note 2: Indexing a custom set of k-mers.

### Indexing a custom set of k-mers

When multiple sequences may belong to the same “target”, as is the case with genetic polymorphisms, it can be desirable to index k-mers distributed across multiple targets rather than across a single contiguous target sequence. The target names in the input FASTA file must be numbers (specifically, zero-indexed numerical identifiers). Each k-mer in the target sequence is associated with the target name specified in the header line. Indexing this FASTA file can then be accomplished in the custom workflow using the **--distinguish** keyword.

custom workflow (--distinguish):

```
kb ref --workflow=custom -i index.idx --distinguish custom.fasta
```

```
kallisto index -t 8 -i index.idx --distinguish custom.fasta
```

Example custom.fasta file (with 3 targets):

```
>0
ACTCTATCATCATCTACTACTACTCGCAGCGACGACATCAGCTTTTTT
>1
GCGCGCCGCCGACGACACGCAGAGAAGAAAGCGCGACGAC
>2
TTATGTGTCGTGTAGTCGTAGTGTGTCGTGCCGCCGCGCGCAA
>2
ATATACGATCATCAGCGACAGACTACTTCAGAAGACTATCA
>0
GTCGATCGGTGTCACATGCGCAAGCGTCAGCGACACGACTTCGG
```

### D-listing a custom set of k-mers

When FASTA sequences are supplied to **--d-list**, distinguishing flanking k-mers (DFKs) are extracted from those sequences and placed in a D-list. Reads containing D-list k-mers will not be mapped. One can also specify a custom set of k-mers to be in the D-list, by using an empty sequence header. In the following example, since the header is absent, *all* k-mers in the sequence will be D-listed (if a header were present, only DFKs would be D-listed).

```
>
ACGCGACATAGCAGACTAGACATTATTTACGTATTATGATAGTAGAT
```

### Supplementary Note 3: Filtering GTF entries when constructing the reference.

#### kb ref: --include-attributes and --exclude-attributes to filter GTF entries

Specific GTF entries can be included or excluded when building a reference transcriptome from a genome FASTA and GTF file. This can be done by using the following arguments to kb ref:

```
--include-attribute KEY:VALUE
```

```
--exclude-attribute KEY:VALUE
```

Where KEY is the name of the field (e.g. gene\_biotype) in the GTF file and the VALUE is the value of the field (e.g. protein\_coding).

The box below shows an example of how to use --include-attribute to include only certain gene biotypes (the remaining gene biotypes present in the GTF file will not be included). Note that these are the same biotypes included in the Ensembl GRCh38 Cell Ranger reference (as of Cell Ranger version 7.1.0).

```
kb ref -i index.idx -g t2g.txt -f1 cdna.fasta \  
  --include-attribute gene_biotype:protein_coding \  
  --include-attribute gene_biotype:lincRNA \  
  --include-attribute gene_biotype:antisense \  
  --include-attribute gene_biotype:IG_LV_gene \  
  --include-attribute gene_biotype:IG_V_gene \  
  --include-attribute gene_biotype:IG_V_pseudogene \  
  --include-attribute gene_biotype:IG_D_gene \  
  --include-attribute gene_biotype:IG_J_gene \  
  --include-attribute gene_biotype:IG_J_pseudogene \  
  --include-attribute gene_biotype:IG_C_gene \  
  --include-attribute gene_biotype:IG_C_pseudogene \  
  --include-attribute gene_biotype:TR_V_gene \  
  --include-attribute gene_biotype:TR_V_pseudogene \  
  --include-attribute gene_biotype:TR_D_gene \  
  --include-attribute gene_biotype:TR_J_gene \  
  --include-attribute gene_biotype:TR_J_pseudogene \  
  --include-attribute gene_biotype:TR_C_gene \  
  genome.fasta genome.gtf
```

**Supplementary Manual:** Reference for kallisto and bustools commands.

## **1. kallisto**

Running kallisto usually involves two steps: 1) Indexing a FASTA file of target sequences via `kallisto index`, and 2) Mapping sequencing reads to kallisto index using `kallisto bus`.

### **1.1 kallisto index**

Builds a kallisto index.

Usage: `kallisto index [arguments] FASTA-files`

Required argument:

`-i, --index=STRING`      Filename for the kallisto index to be constructed

Optional arguments:

`-k, --kmer-size=INT`      k-mer (odd) length (default: 31, max value: 31)

`-t, --threads=INT`      Number of threads to use (default: 1)

`-d, --d-list=STRING`      Path to a FASTA-file containing sequences to mask from quantification (i.e. to extract distinguishing flanking k-mers from).

`--make-unique`      Replace repeated target names with unique names

`--aa`      Generate index from a FASTA-file containing amino acid sequences

`--distinguish`      Generate index where sequences are distinguished by the sequence name, for example, when indexing k-mers distributed across multiple targets rather than across a single contiguous target sequence.

`-T, --tmp=STRING`      Temporary directory (default: tmp)

`-m, --min-size=INT`      Length of minimizers (default: automatically chosen)

`-e, --ec-max-size=INT`      Maximum number of targets in an equivalence class (default: no maximum)

Among the optional arguments in `kallisto index`, in a general use case, typically only `-i` (`--index`; to specify the name of the index output filename), `-t` (`--threads`; to specify the number of threads), and `-d` (`--d-list`; to specify the filename from which to extract distinguishing flanking k-mers) are used.

## **1.2 kallisto bus**

Generates a BUS file containing the results from mapping sequencing reads to a kallisto index.

Usage:

```
kallisto bus [arguments] FASTQ-files
```

```
kallisto bus [arguments] --batch=batch.txt
```

Required arguments:

`-i, --index=STRING`                      Filename for the kallisto index to be used for pseudoalignment

`-o, --output-dir=STRING`                Directory to write output to

`-x, --technology=STRING`                The “technology” string for the sequencing technology used

Other arguments:

`-l, --list`                                List the technologies that are hard-coded into kallisto so the name of the technology can simply be supplied as the technology string

`-B, --batch=FILE`                        Path to a batch file. The batch file is a text file listing all the samples to be analyzed with the paths to their respective FASTQ files. If a batch file is supplied, then one shouldn't supply FASTQ files on the command line.

`-t, --threads=INT`                        Number of threads to use (default: 1)

`-b, --bam`                                Input file is a BAM file rather than a set of FASTQ files. Note: This is a nonstandard workflow. It is *strongly* recommended to supply FASTQ files rather than use this option and not all technologies are supported by this option.

`-n, --num`                                Output read number in flag column of BUS file

The read number is zero-indexed. One can view the read numbers by inspecting the BUS file using *bustools text*. This option is useful for pulling specific mapped reads out of the FASTQ file or for examining which reads did not end up being mapped by kallisto. (Important note: BUS files with read numbers in the flag column can NOT be used in quantification tasks with *bustools*). (Note: incompatible with `--bam`)

`-N, --numReads=INT`

Maximum number of reads to process from supplied input. This is useful for processing a small subset of reads from a large sequencing experiment as a quick quality control. Moreover, the program returns 1 if the number of reads processed from the input is less than the number supplied here. This is useful for catching errors when we expect a certain number of reads to be present in the input but not all the reads end up being there.

`-T, --tag=STRING`

5' tag sequence to identify UMI reads for certain technologies. This is useful for smart-seq3 where the UMI-containing reads have an 11-bp tag sequence (ATTGCGCAATG) located at the beginning of the UMI location. If this tag sequence is present immediately before the UMI location, then the UMI is processed into the output BUS file; for all other sequences, the UMI field in the BUS file is left empty (the field is populated with the value -1 in binary format).

Note: Matching the tag sequence is done with a hamming distance error tolerance of 1 if the tag is longer than 5 nucleotides. Otherwise, no error tolerance is permitted.

Note: If strand-specificity is enabled, it will only be applied to the UMI-containing reads.

`--fr-stranded`

Strand specific reads, first read forward

`--rf-stranded`

Strand specific reads, first read reverse

|                               |                                                                                                                                                                                                                                                                                                                                                                                                                                                                                                               |
|-------------------------------|---------------------------------------------------------------------------------------------------------------------------------------------------------------------------------------------------------------------------------------------------------------------------------------------------------------------------------------------------------------------------------------------------------------------------------------------------------------------------------------------------------------|
| <code>--unstranded</code>     | Treat all read as non-strand-specific                                                                                                                                                                                                                                                                                                                                                                                                                                                                         |
| <code>--paired</code>         | Treat reads as paired (i.e. if two biological read sequences are present across two FASTQ files, they will be mapped taking into account their paired-endness: fragment length distribution will be estimated for the read pairs, and only one read in the pair needs to map successfully in order to be considered successful pseudoalignment)                                                                                                                                                               |
| <code>--aa</code>             | Align to index generated from a FASTA-file containing amino acid sequences                                                                                                                                                                                                                                                                                                                                                                                                                                    |
| <code>--inleaved</code>       | Specifies that input is an interleaved FASTQ file. That is, only one FASTQ file is supplied and the sequences are interleaved. For example, instead of an R1 and R2 FASTQ file, a single FASTQ file can be supplied where the reads are listed in order of each R2 read immediately following each R1 read. This is also useful when piping interleaved output generated by another program directly into <i>kallisto bus</i> which can be done by supplying - as the input file in lieu of FASTQ file names. |
| <code>--batch-barcodes</code> | Records both the generated sample-specific barcodes as well as the cell barcodes extracted from the reads in the output BUS file. If not supplied, then the sample-specific barcodes are not recorded.                                                                                                                                                                                                                                                                                                        |

In the output directory specified by `-o` or `--output-dir`, the following files are made:

- output.bus: A BUS file containing the mapped reads information, which will be further processed using bustools.
- transcripts.txt: A text file containing a list of the names of the targets or transcripts used.
- matrix.ec: A text file containing the equivalence classes. The equivalence class number (zero-indexed) is in the first column and a comma-separated list of target or transcript IDs belonging to that equivalence class are in the second column. The transcript IDs are numbers (zero-indexed) that correspond to the line numbers (zero-indexed) in the transcripts.txt file.
- run\_info.json: Contains information about the run, including percent of reads

- pseudoaligned, number of reads processed, index version, etc.
- flens.txt: Only produced when using paired-end mapping. Contains the fragment length distribution, which can be used by `kallisto quant-tcc` to produce TPM abundance values.

### **1.3 kallisto quant-tcc**

Quantifies abundance from pre-computed transcript-compatibility counts. It takes in a transcript compatibility counts (TCC) matrix outputted by `bustools count` and runs an expectation-maximization (EM) algorithm to produce transcript abundances. This is useful for producing TPM values from bulk RNA-seq and smart-seq2 RNA-seq data. The output files can be used by bulk RNA-seq differential gene expression programs.

Usage: `kallisto quant-tcc [arguments] transcript-compatibility-counts-file`

Required arguments:

- `-o, --output-dir=STRING` Directory to write output to
- `-e, --ec-file=FILE` File containing equivalence classes (the equivalence class file in the same directory as the output matrix file should be used)

Other arguments:

- `-i, --index=STRING` Filename for the kallisto index to be used (required if `--txnames` is not supplied or if any of the fragment length options: `-f`, `-l`, `-s`, is supplied since the index contains transcript lengths, which is necessary for length normalization)
- `-T, --txnames=STRING` File with names of transcripts (required if index file not supplied)
- `-f, --fragment-file=FILE` File containing fragment length distribution (flens.txt outputted by `kallisto`)
- `-l, --fragment-length=DOUBLE` Estimated average fragment length



`-s, --sd=DOUBLE` Estimated standard deviation of fragment length  
 (note: `-l, -s` values only should be supplied when effective length normalization needs to be performed but `--fragment-file` is not specified)

Note: If none of the fragment length options: `-f -l, -s`, are supplied, then effective length normalization is not performed (i.e. transcript length isn't taken into account when quantification is performed).

`-p, --priors=FILE` Priors for the EM algorithm, either as raw counts or as probabilities. Pseudocounts are added to raw counts to prevent zero valued priors. Supplied in the same order as the transcripts in the transcriptome (e.g. in `--txnames`).

`-t, --threads=INT` Number of threads to use (default: 1)

`-g, --genemap=FILE` File for mapping transcripts to genes (this is the `t2g.txt` file produced by `kb ref` in `kb-python` and is required for obtaining gene-level abundances)

`-G, --gtf=FILE` GTF file for transcriptome information (can be used instead of `--genemap` for obtaining gene-level abundances)

`-b, --bootstrap-samples=INT` Number of bootstrap samples (default: 0)  
 Bootstrap samples are useful for obtaining inferential variance which can be used by programs such as sleuth.

`--matrix-to-files` Reorganize matrix output into abundance tsv files

`--matrix-to-directories` Reorganize matrix output into abundance tsv files across multiple directories

`--seed=INT` Seed for the bootstrap sampling (default: 42)

`--plaintext` Output plaintext only, not HDF5 (When `--matrix-to-directories` or `--matrix-to-files` are supplied, HDF5 files are outputted by default, in addition to the plaintext abundance tsv files since HDF5 files containing abundance information are used by programs such as sleuth; this option disables that).

In the output directory specified by `-o` or `--output-dir`, the following files are made:

- matrix.abundance.mtx: A sample-by-transcript (or cell-by-transcript) MatrixMarket sparse matrix file containing the estimated transcript counts.
- matrix.abundance.gene.mtx: A sample-by-gene (or cell-by-gene) MatrixMarket sparse matrix file containing the estimated transcript counts summed up to gene-level. Only made if a transcript-to-gene mapping was provided.
- matrix.abundance.tpm.mtx: A sample-by-transcript (or cell-by-transcript) MatrixMarket sparse matrix file containing the normalized transcript abundances (if effective length normalization is performed, then the results are in length-normalized TPM units; otherwise the results are in CPM [counts-per-million] units wherein each value is normalized by the sum of all counts for that particular sample or cell).
- matrix.abundance.gene.tpm.mtx: A sample-by-gene (or cell-by-gene) MatrixMarket sparse matrix file containing the same information as `matrix.abundance.tpm.mtx` except summed up to gene-level if a transcript-to-gene mapping was provided.
- transcripts.txt: A text file containing a list of the names of the targets or transcripts used (not made if a transcripts file was already provided via `--txnames`). These transcripts correspond to the columns of transcripts in the matrix abundance output files.
- genes.txt: A text file containing a list of genes, if a transcript-to-gene mapping was provided. These genes correspond to the columns of genes in the matrix abundance output files.
- `--matrix-to-files`: If this option is provided, the abundance output files will be named `abundance_{n}.tsv` and `abundance_{n}.h5` (hdf5 format) where `{n}` is the sample number or cell number (which corresponds to the rows in the matrix files). If bootstrapping is enabled, additional abundance tsv files (starting with the prefix `bs_abundance_{n}_`) will be created for each bootstrap sample. If a transcript-to-gene mapping is provided, `abundance.gene_{n}.tsv` files will be created as well with the gene-level quantification.
- `--matrix-to-directories`: If this option is provided, directories named `abundance_{n}`

(where {n} is the sample number or cell number, corresponding to the rows in the matrix files) will be created. Within each directory, an abundance.tsv text file and abundance.h5 HDF5 file will be created containing the quantifications for that particular sample or cell. If bootstrapping is enabled, additional abundance tsv files (starting with the prefix bs\_abundance\_) will be created for each bootstrap sample. If a transcript-to-gene mapping is provided, an abundance.gene.tsv file will be created within each directory with the gene-level quantification.

The first few lines of an abundance tsv file looks as follows:

| target_id         | length | eff_length | est_counts | tpm      |
|-------------------|--------|------------|------------|----------|
| ENST00000641515.2 | 2618   | 2349.39    | 0          | 0        |
| ENST00000426406.4 | 939    | 670.39     | 0          | 0        |
| ENST00000332831.4 | 995    | 726.39     | 0          | 0        |
| ENST00000616016.5 | 3465   | 3196.39    | 5.68407    | 0.128913 |
| ENST00000618323.5 | 3468   | 3199.39    | 1.83535    | 0.041586 |

### **1.3 kallisto quant**

`kallisto quant` is an old usage of kallisto when kallisto was first developed for bulk RNA-seq quantification. It is now recommended that users use the `kallisto bus` command instead.

As such, documentation for the old `kallisto quant` is not within the scope of this protocol.

### **1.4 kallisto inspect**

Inspects and gives information about an index. The index can be loaded more quickly by using multiple threads, which can be specified by the `-t` option.

Example usage:

```
kallisto inspect -t 8 /path/to/kallisto/index.idx
```

Sample output:

```
[index] k-mer length: 31
[index] number of targets: 252,301
[index] number of k-mers: 155,644,518
[index] number of distinguishing flanking k-mers: 7,425,493
[inspect] Index version number = 12
[inspect] number of unitigs = 9411252
```

```
[inspect] minimizer length = 23
[inspect] max EC size = 3873
[inspect] number of ECs discarded = 0
```

## **1.5 kallisto version**

Prints out the version of the kallisto software that is being used

## **1.6 kallisto cite**

Prints out citation information

## **2. bustools**

bustools is run on BUS files generated by the `kallisto bus` command. The first step in working with BUS files is usually to sort the BUS file using `bustools sort`. This will organize the BUS file, making it suitable for use with other bustools commands. In a standard workflow, the sorted BUS file is error-corrected to a barcode on list via `bustools correct`, then sorted again, then quantified into count matrices via `bustools count`. There are many bustools commands, some of which are outside the scope of this protocol and some of which are in development, therefore only the bustools commands relevant to most RNA-seq analyses are presented here.

Many of the bustools commands can read from the standard input (stdin), by specifying `-` as the input file and write to standard output (stdout) using the `-p` flag if available.

### **2.1 bustools sort**

Sorts a BUS file. `bustools sort` (using the default options) should always be done before any additional processing of the BUS file following generation of the BUS file from the `kallisto bus` command. Many bustools commands will not work properly with an unsorted BUS file. Increasing the number of threads and maximum memory will speed up sorting.

The default behavior is to sort by barcode, UMI, equivalence class (ec), then the flag column.

Usage: `bustools sort [options] bus-files`

Arguments:

`-t, --threads=INT`                      Number of threads to use (default: 1)

|                                  |                                                                                                                                                                                                           |
|----------------------------------|-----------------------------------------------------------------------------------------------------------------------------------------------------------------------------------------------------------|
| <code>-m, --memory=STRING</code> | Maximum memory used (default: 4G)                                                                                                                                                                         |
| <code>-T, --temp=STRING</code>   | Location and prefix for temporary files (required if using <code>-p</code> , otherwise defaults to output)                                                                                                |
| <code>-o, --output=STRING</code> | Filename to output sorted BUS file into                                                                                                                                                                   |
| <code>-p, --pipe</code>          | Write to standard output                                                                                                                                                                                  |
| <code>--umi</code>               | Sort by UMI, barcode, then ec                                                                                                                                                                             |
| <code>--count</code>             | Sort by multiplicity (count), barcode, UMI, then ec                                                                                                                                                       |
| <code>--flags</code>             | Sort by flag, ec, barcode, then UMI                                                                                                                                                                       |
| <code>--flags-bc</code>          | Sort by flag, barcode, UMI, then ec                                                                                                                                                                       |
| <code>--no-flags</code>          | Ignore and reset the flag column while sorting. If read numbers are present in the flag column of the BUS file, sorting using this option renders BUS file suitable for use in generating count matrices. |

## **2.2 bustools correct**

Error-corrects the barcodes in a BUS file to an “on list”.

Error correction is done based on a hamming distance 1 mismatch between each BUS file barcode sequence and each “on list” sequence. For barcode error correction, the “on list” file simply contains a list of sequences in the “on list”.

Another operation supported is the replacement operation: Each “on list” sequence (in the first column of the “on list” file) has a replacement sequence (in the second column of the “on list” file) designated therefore if a BUS file barcode has an exact match to one of those “on list” sequences, it is replaced with its replacement sequence.

Note: The input BUS file need not be sorted.

Usage: `bustools correct [options] bus-files`

Arguments:

- `-o, --output=STRING`      Filename to output barcode-corrected BUS file into
- `-w, --onlist=FILE`      File containing the “on list” sequences
- `-p, --pipe`              Write to standard output
- `-r, --replace`          Perform the replacement operation rather than the barcode error correction operation for the file supplied in the `-w` option

## **2.3 bustools count**

Generates count matrices from BUS files that have been sorted and barcode-error-corrected.

Usage: `bustools count [options] sorted-bus-files`

Arguments:

- `-o, --output=STRING`      The prefix of the output files for count matrices
- `-g, --genemap=FILE`      File for mapping transcripts to genes (when using kb ref in kb-python, this is the `t2g.txt` file produced by kb ref)
- `-e, --ecmap=FILE`      File for mapping equivalence classes to transcripts
- `-t, --txnames=FILE`      File with names of transcripts
- `--genecounts`            Aggregate counts to genes only. This option generates a gene count matrix; if this option is not supplied, a transcript-compatibility counts (TCC) matrix (where each equivalence class gets a count) is generated instead.
- `--umi-gene`              Handles cases of UMI collisions. For example, a case may be where two reads with the same UMI sequence and the same barcode map to different genes. With this option enabled, those reads are considered to be two distinct molecules which were unintentionally labeled with the same UMI, and hence each gene gets a count.

- `--cm` Counts multiplicities rather than UMIs. In other words, no UMI collapsing is performed and each mapped read is its own unique molecule regardless of the UMI sequence (i.e. the UMI sequence is ignored).
- `-m, --multimapping` Include bus records that map to multiple genes. When `--genecounts` is enabled, this option causes counts to be distributed uniformly across all the mapped genes (for example, if a read multimaps to two genes, each gene will get a count of 0.5).
- `-s, --split=FILE` Split output matrix in two (plus ambiguous) based on the list of transcript names supplied in this file. If a UMI (after collapsing) or a read maps to transcripts found in this file, the count is entered into a matrix file with the extension `.2.mtx`; if it maps to transcripts not in this file, the count is entered into a separate matrix file with the extension `.mtx`; if it maps to some transcripts in this file and some transcripts not in this file, the count is entered into a third matrix file with the extension `.ambiguous.mtx`.  
When quantifying `nascent`, `ambiguous`, and `mature` RNA species, the nascent transcript names (which will actually simply be the gene IDs themselves) will be listed in the file supplied to `--split` so that the `.mtx` file contains the `mature` RNA counts, the `.2.mtx` file contains the `nascent` RNA counts, and the `.ambiguous.mtx` file contains the `ambiguous` RNA counts. Note that `kb-python` renames `.mtx` to `.mature.mtx` and renames `2.mtx` to `.nascent.mtx`.

#### Output:

Each output file is prefixed with what is supplied to the `--output` option. In `kb count` within `kb-python`, the prefix is `cells_x_genes`. Thus, the files outputted (when generating a gene count matrix via `--genecounts`) will be `cells_x_genes.mtx` (the matrix file), `cells_x_genes.barcodes.txt` (the barcodes; i.e. the rows of the matrix), and `cells_x_genes.genes.txt` (the genes; i.e. the columns of the matrix). When generating a TCC matrix, `cells_x_genes.ec.txt` will be generated in lieu of `cells_x_genes.genes.txt` as the columns of the matrix will be equivalence classes (ECs) rather than genes. If both sample-specific barcodes and cell barcodes are supplied (as is the case when one uses `--batch-barcodes` in `kallisto bus`), then an additional `cells_x_genes.barcodes.prefix.txt` file will be created containing the sample-specific barcodes.

The lines of this file correspond to the lines in the [cells\\_x\\_genes.barcodes.txt](#) (both files will have the same number of lines). Finally, when `--split` is supplied, additional `.mtx` matrix files will be generated (see the `--split` option described above).

## **2.4 bustools inspect**

Produces a report summarizing the contents of a sorted BUS file. The report can be output either to standard output or to a JSON file.

Usage: `bustools inspect [options] sorted-bus-file`

Arguments:

- `-o, --output=STRING`      Filename to output sorted BUS file into
- `-e, --ecmap=FILE`        File for mapping equivalence classes to transcripts
- `-w, --onlist=FILE`       File containing the barcodes “on list”
- `-p, --pipe`                Write to standard output

Sample report output in standard output (using `-p`):

```
Read in 3148815 BUS records
```

```
Total number of reads: 3431849
```

```
Number of distinct barcodes: 162360
```

```
Median number of reads per barcode: 1.000000
```

```
Mean number of reads per barcode: 21.137281
```

```
Number of distinct UMIs: 966593
```

```
Number of distinct barcode-UMI pairs: 3062719
```

```
Median number of UMIs per barcode: 1.000000
```

```
Mean number of UMIs per barcode: 18.863753
```

```
Estimated number of new records at 2x sequencing depth: 2719327
```

```
Number of distinct targets detected: 70492
```

```
Median number of targets per set: 2.000000
```

```
Mean number of targets per set: 3.091267
```

```
Number of reads with singleton target: 1233940
```

```
Estimated number of new targets at 2x sequencing depth: 6168
```



Number of barcodes in agreement with on-list: 92889 (57.211752%)  
Number of reads with barcode in agreement with on-list: 3281671  
(95.623992%)

Sample report output in JSON format:

```
{
  "numRecords": 3148815,
  "numReads": 3431849,
  "numBarcodes": 162360,
  "medianReadsPerBarcode": 1.000000,
  "meanReadsPerBarcode": 21.137281,
  "numUMIs": 966593,
  "numBarcodeUMIs": 3062719,
  "medianUMIsPerBarcode": 1.000000,
  "meanUMIsPerBarcode": 18.863753,
  "gtRecords": 2719327,
  "numTargets": 70492,
  "medianTargetsPerSet": 2.000000,
  "meanTargetsPerSet": 3.091267,
  "numSingleton": 1233940,
  "gtTargets": 6168,
  "numBarcodesOnOnlist": 92889,
  "percentageBarcodesOnOnlist": 0.57211752,
  "numReadsOnOnlist": 3281671,
  "percentageReadsOnOnlist": 0.95623992
}
```

Note: The numTargets, medianTargetsPerSet, meanTargetsPerSet, numSingleton, and gtTargets values are only generated if the `--ecmap` option is provided. The numBarcodesOnOnlist, percentageBarcodesOnOnlist, numReadsOnOnlist, percentageReadsOnOnlist values are only generated if the `--onlist` is provided.

## **2.5 bustools allowlist**

Generates an “on list” based on the barcodes in a sorted BUS file. This is a way of generating an on list that the barcodes in the BUS file will be corrected to, for technologies that don’t provide an on list.

Usage: `bustools allowlist [options] sorted-bus-file`

Arguments:

- `-o, --output=STRING` Filename to output the “on list” into
- `-f, --threshold=INT` A highly optional parameter specifying the minimum number of times a barcode must appear to be included in “on list”. If not provided, a threshold will be determined based on the first 200 to 100200 BUS records.

## **2.6 bustools capture**

Separates a BUS file into multiple files according to the capture criteria.

Usage: bustools capture [options] bus-files

Capture options:

- `-F, --flags` Capture list is a list of flags to capture
- `-s, --transcripts` Capture list is a list of transcripts to capture
- `-u, --umis` Capture list is a list of UMI sequences to capture
- `-b, --barcode` Capture list is a list of barcodes to capture

Arguments:

- `-o, --output=STRING` Name of file for the captured BUS output
- `-x, --complement` Take complement of captured set (i.e. output all BUS records that do NOT match an entry in the capture list)
- `-c, --capture=FILE` File containing the “capture list” (i.e. list of transcripts, transcripts, flags, UMI sequences, or barcode sequences)
- `-e, --ecmap=FILE` File for mapping equivalence classes to transcripts (required for --transcripts)
- `-t, --txnames=FILE` File with names of transcripts (required for --transcripts)
- `-p, --pipe` Write to standard output

Note: If you use the `-b (--barcode)` option and want to capture all records containing a sample-specific barcode from running `--batch-barcodes` in `kallisto bus`, in the “capture list” file, enter the 16-bp sample-specific barcode followed by a `*` character (e.g. `AAAAAAAAAAAAAAAAACT*`).

## **2.7 bustools text**

Converts a binary BUS file into its plaintext representation. The plaintext will have the columns (in order): barcode, UMI, equivalence class, count, flag, and pad. (Note: The last two columns will only be outputted if the respective option is specified by the user).

Usage: `bustools text [options] bus-files`

### Arguments:

- `-o, --output=STRING`      Filename of the output text file
- `-f, --flags`              Write the flag column
- `-d, --pad`                Write the pad column  
(the “pad” column is an additional 32-bit field in the BUS file, in case one would like to use the BUS format to store additional data for each BUS record; this column is typically not used.)
- `-p, --pipe`              Write to standard output
- `-a, --showAll`          Show all 32 bases in the barcodes field (e.g. if `--batch-barcodes` is specified in `kallisto bus`, the cell barcodes are stored in barcodes field and are used for bustools barcode correction to an on-list; however, the artificial sample-specific barcodes are stored as an additional “hidden” field in the barcodes column, immediately preceding the cell barcodes, and may be truncated or left-padded with A’s to fill the 32 bases. For example, if the cell barcode is 12 bases, there will be 4 A’s followed by the 16-bp sample-specific barcode followed by the 12-base cell barcode. If the cell barcode is 26 bases, the last 6 bases of the sample-specific barcode will be shown followed by the 26-base cell barcode).

An example of the plaintext output of a BUS file (with the flag column):

```
AAAAGATCACTATGCACTATCATC  GCAAAACCTT      156  2    0
AAAAGATCAGATCGCACACTTTCA  TAGAGTAACC     438  3    0
AAAAGATCAGATCGCAGCTCTACT  TTAGGTATAG    1808  1    0
AAAAGATCAGCACCTCCTGACTTC  AATCGGCATT    4481  1    0
```

If one runs `kallisto bus` with the `-n (--num)` option, the read number (zero-indexed) of the mapped reads will be stored in the flags column (i.e. the fifth column). One can view those read numbers using `bustools text` to identify which reads in the input FASTQ files mapped (and which reads were unmapped).

## **2.8 bustools fromtext**

Converts a plaintext representation of a BUS file to a binary BUS file. The plaintext input file should have four columns: barcode, UMI, equivalence class, and count. Optionally, a fifth column (the flags column) can be supplied.

Usage: `bustools fromtext [options] text-files`

Arguments:

```
-o, --output=STRING          Filename to write the output BUS file
-p, --pipe                   Write to standard output
```

## **2.9 bustools extract**

Extracts the successfully mapped sequencing reads from the input FASTQ files that were processed with `kallisto bus` with the `-n (--num)` option, which places the read number (zero-indexed) in the flags column of the BUS file. Although BUS files with read numbers present in the flags column should not be used for downstream quantification, they can be used by `bustools extract` to extract the original sequencing reads (as well as by `bustools text` to view the sequencing read number along with the barcode, UMI, and equivalence class).

Note: The BUS file must be sorted by flag. The output BUS file directly from `kallisto` should already be sorted by flag, but, if not, one can use `bustools sort --flag` on the BUS file.

Usage: `bustools extract [options] sorted-by-flag-bus-file`

#### Arguments:

- `-o, --output=STRING` Directory that the output FASTQ files will be stored in
  
- `-f, --fastq=STRING` FASTQ file(s) from which to extract reads (comma-separated list). These should be the same files used as input to kallisto bus.
  
- `-N, --nFastqs=INT` Number of FASTQ file(s) per run. For example, in 10xv3 where there are two FASTQ files (and R1 and R2 file), `--nFastqs=2` should be set.

This is especially useful to use in conjunction with `bustools capture` when one wishes to extract specific reads (e.g. reads that contain a certain barcode or reads whose equivalence class contains a certain transcript). Below, we show an example of how to extract reads from two input files: [R1.fastq.gz](#) and [R2.fastq.gz](#) entered into a kallisto bus run with results outputted into a directory named `output_dir`. We'll extract reads that are compatible with either the transcript `ENSMUST00000171143.2` or `ENSMUST00000131532.2`.

Create a file called `capture.txt` containing the following two lines:

```
ENSMUST00000171143.2
ENSMUST00000131532.2
```

Run the following:

```
bustools capture -c capture.txt --transcripts \
--ecmap=output_dir/matrix.ec \
--txnames=output_dir/transcripts.txt -p \
output_dir/output.bus | bustools extract --nFastqs=2 \
--fastq=R1.fastq.gz,R2.fastq.gz -o extracted_output -
```

The capture results are directly piped into the extract command, and the extracted FASTQ sequencing reads output are placed into the paths `extracted_output/1.fastq.gz` and `extracted_output/2.fastq.gz` (for the input files [R1.fastq.gz](#) and [R2.fastq.gz](#), respectively).

`bustools extract` does not work when you have sample-specific barcodes in your BUS file because each sample's read number (as recorded in the flags column of the BUS file) starts from 0. To work around this, you should first use `bustools capture` to isolate a specific sample and then supply that specific sample's FASTQ file(s).

## **2.10 bustools umicorrect**

Implements the UMI correction algorithm of UMI-tools and outputs a BUS file with the

corrected UMIs.

Usage: bustools umicorrect [options] sorted-bus-file

Arguments:

- `-o, --output=STRING`      Filename of the output BUS file with UMIs corrected
- `-p, --pipe`                Write to standard output
- `-g, --genemap=FILE`        File for mapping transcripts to genes  
(when using kb ref in kb-python, this is the  
t2g.txt file produced by kb ref)
- `-e, --ecmap=FILE`         File for mapping equivalence classes to transcripts
- `-t, --txnames=FILE`        File with names of transcripts

## **2.11 bustools compress**

Takes in a BUS file, sorted by barcode-umi-ec (i.e. the default option for `bustools sort`), and compresses it.

Usage: bustools compress [options] sorted-bus-file

Arguments:

- `-N, --chunk-size=INT`        Number of rows to compress as a single block
- `-o, --output=STRING`        Filename for the output compressed BUS file
- `-p, --pipe`                Write to standard output

## **2.12 bustools decompress**

Takes in a compressed BUS file and inflates (i.e. decompresses) it.

Usage: bustools decompress [options] compressed-bus-file

Arguments:

- `-o, --output=STRING`        Filename for the output decompressed BUS file
- `-p, --pipe`                Write to standard output

### **2.13 bustools version**

Prints out the version of the bustools software that is being used.

### **2.14 bustools cite**

Prints out citation information.

## **Supplementary Tutorial:** An example mouse multiplexed single-nucleus SPLiT-seq preprocessing workflow.

Here we describe how to process a mouse multiplexed single-nucleus SPLiT-seq assay. The input FASTQ files are split across multiple subpools such that two cells may have the same cell barcode but be in different subpools. The SPLiT-seq assay uses both oligo-dT and random hexamer primers (which are represented in the third component of the cell barcode, corresponding to the first round of split pooling). As a result, two sets of matrices will be produced: One with both the oligo-dT and random hexamer barcodes in the same count matrix and one with the oligo-dT barcodes converted into the random hexamer barcodes (so that each barcode is unique to one nucleus). This facilitates investigation of each library type separately (should one wish to generate an “oligo-dT” count matrix and a “random hexamer” count matrix) as well as of the two library types combined together.

### **1. Install kb-python.**

```
pip install kb_python
```

### **2. Download the mouse genome and annotation files.**

```
wget ftp.ensembl.org/pub/release-108/fasta/mus_musculus/dna/Mus_musculus.GRCm39.dna.primary_assembly.fa.gz  
wget ftp.ensembl.org/pub/release-108/gtf/mus_musculus/Mus_musculus.GRCm39.108.gtf.gz
```



### 3. Build the index.

To illustrate index generation with GTF filtering we show below how to filter the GTF file to only keep the relevant biotypes (the same ones that are used in the CellRanger reference). This can improve both accuracy and efficiency. Additional methods to optimize the GTF file can also be used such as the one proposed in Pool et al., 2023<sup>39</sup> which can greatly increase gene detection sensitivity.

```
kb ref --workflow=nac -i index.idx -g t2g.txt \  
  -c1 cdna.txt -c2 nascent.txt -f1 cdna.fasta -f2 nascent.fasta \  
  --include-attribute gene_biotype:protein_coding \  
  --include-attribute gene_biotype:lncRNA \  
  --include-attribute gene_biotype:lincRNA \  
  --include-attribute gene_biotype:antisense \  
  --include-attribute gene_biotype:IG_LV_gene \  
  --include-attribute gene_biotype:IG_V_gene \  
  --include-attribute gene_biotype:IG_V_pseudogene \  
  --include-attribute gene_biotype:IG_D_gene \  
  --include-attribute gene_biotype:IG_J_gene \  
  --include-attribute gene_biotype:IG_J_pseudogene \  
  --include-attribute gene_biotype:IG_C_gene \  
  --include-attribute gene_biotype:IG_C_pseudogene \  
  --include-attribute gene_biotype:TR_V_gene \  
  --include-attribute gene_biotype:TR_V_pseudogene \  
  --include-attribute gene_biotype:TR_D_gene \  
  --include-attribute gene_biotype:TR_J_gene \  
  --include-attribute gene_biotype:TR_J_pseudogene \  
  --include-attribute gene_biotype:TR_C_gene \  
  Mus_musculus.GRCm39.dna.primary_assembly.fa.gz \  
  Mus_musculus.GRCm39.108.gtf.gz
```

### 4. Map the input sequencing reads to the index.

This assay has multiple FASTQ files across multiple subpools as well as two primer types. To process this, we supply a batch.txt file containing the FASTQ files along with their designated subpool, a barcodes.txt file containing the three barcode components (since the assay contains three 8-bp barcodes, each separated by a linker, in the first read file), and a replace.txt file designating how to convert the random hexamer barcodes to the oligo-dT barcodes for the “combined” matrix. The final command to run with these files is as follows:

```
kb count --strand=forward -r replace.txt -w barcodes.txt \  
  --workflow=nac -i index.idx -g t2g.txt -c1 cdna.txt \  
  -c2 nascent.txt -x 1,10,18,1,48,56,1,78,86:1,0,10:0,0,0 \  
  --sum=total -o output_dir --batch-barcodes batch.txt
```

## 5. Analyze the output.

Output (both the oligo-dT and random hexamer barcodes in the same count matrix):

- output\_dir/counts\_unfiltered/cells\_x\_genes.mature.mtx
- output\_dir/counts\_unfiltered/cells\_x\_genes.nascent.mtx
- output\_dir/counts\_unfiltered/cells\_x\_genes.ambiguous.mtx
- output\_dir/counts\_unfiltered/cells\_x\_genes.cell.mtx
- output\_dir/counts\_unfiltered/cells\_x\_genes.nucleus.mtx
- output\_dir/counts\_unfiltered/cells\_x\_genes.total.mtx
- output\_dir/counts\_unfiltered/cells\_x\_genes.barcodes.txt
- output\_dir/counts\_unfiltered/cells\_x\_genes.barcodes.prefix.txt
- output\_dir/counts\_unfiltered/cells\_x\_genes.genes.txt
- output\_dir/counts\_unfiltered/cells\_x\_genes.genes.names.txt

Output (the oligo-dT and random hexamer barcodes are combined):

- output\_dir/counts\_unfiltered\_modified/cells\_x\_genes.mature.mtx
- output\_dir/counts\_unfiltered\_modified/cells\_x\_genes.nascent.mtx
- output\_dir/counts\_unfiltered\_modified/cells\_x\_genes.ambiguous.mtx
- output\_dir/counts\_unfiltered\_modified/cells\_x\_genes.cell.mtx
- output\_dir/counts\_unfiltered\_modified/cells\_x\_genes.nucleus.mtx
- output\_dir/counts\_unfiltered\_modified/cells\_x\_genes.total.mtx
- output\_dir/counts\_unfiltered\_modified/cells\_x\_genes.barcodes.txt
- output\_dir/counts\_unfiltered\_modified/cells\_x\_genes.barcodes.prefix.txt
- output\_dir/counts\_unfiltered\_modified/cells\_x\_genes.genes.txt
- output\_dir/counts\_unfiltered\_modified/cells\_x\_genes.genes.names.txt

Note that the cells\_x\_genes.barcodes.prefix.txt will contain a unique identifier for each subpool.

**Information about batch.txt, barcodes.txt, and replace.txt files:**

**batch.txt:**

Example with three subpools, each sequenced on four lanes:

|           |                      |                      |
|-----------|----------------------|----------------------|
| subpool_1 | S1_lane1_R1.fastq.gz | S1_lane1_R2.fastq.gz |
| subpool_1 | S1_lane2_R1.fastq.gz | S1_lane2_R2.fastq.gz |
| subpool_1 | S1_lane3_R1.fastq.gz | S1_lane3_R2.fastq.gz |
| subpool_1 | S1_lane4_R1.fastq.gz | S1_lane4_R2.fastq.gz |
| subpool_2 | S2_lane1_R1.fastq.gz | S2_lane1_R2.fastq.gz |
| subpool_2 | S2_lane2_R1.fastq.gz | S2_lane2_R2.fastq.gz |
| subpool_2 | S2_lane3_R1.fastq.gz | S2_lane3_R2.fastq.gz |
| subpool_2 | S2_lane4_R1.fastq.gz | S2_lane4_R2.fastq.gz |
| subpool_3 | S3_lane1_R1.fastq.gz | S3_lane1_R2.fastq.gz |
| subpool_3 | S3_lane2_R1.fastq.gz | S3_lane2_R2.fastq.gz |
| subpool_3 | S3_lane3_R1.fastq.gz | S3_lane3_R2.fastq.gz |
| subpool_3 | S3_lane4_R1.fastq.gz | S3_lane4_R2.fastq.gz |

In this configuration, subpool\_1 will have the sample-specific barcode AAAAAAAAAAAAAAAAAA, subpool\_2 will have the sample-specific barcode AAAAAAAAAAAAAAAAAAC, and subpool\_3 will have the sample-specific barcode AAAAAAAAAAAAAAAAAAG. This mapping can be found in the output\_dir/matrix.cells and output\_dir/matrix.sample.barcodes files. These sample-specific barcodes are found in cells\_x\_genes.barcodes.prefix.txt to identify the subpool a specific cell barcode originated from when inspecting the count matrices.

**barcodes.txt:**

The cell barcodes contain three 8-bp components so we should correct each component individually to its own “on list”. This can be done by having multiple columns in the barcodes.txt file. Note that the first two columns have 96 barcodes and the third column has 192 barcodes.

|          |          |          |
|----------|----------|----------|
| AACGTGAT | AACGTGAT | CATTCCTA |
| AAACATCG | AAACATCG | CTTCATCA |
| ATGCCTAA | ATGCCTAA | CCTATATC |
| AGTGGTCA | AGTGGTCA | ACATTTAC |
| ACCACTGT | ACCACTGT | ACTTAGCT |
| ACATTGGC | ACATTGGC | CCAATTCT |
| CAGATCTG | CAGATCTG | GCCTATCT |
| CATCAAGT | CATCAAGT | ATGCTGCT |
| CGCTGATC | CGCTGATC | CATTTACA |
| ACAAGCTA | ACAAGCTA | ACTCGTAA |
| CTGTAGCC | CTGTAGCC | CCTTTGCA |

AGTACAAG AGTACAAG ACTCCTGC  
AACAAACCA AACAAACCA ATTTGGCA  
AACCGAGA AACCGAGA TTATTCTG  
AACGCTTA AACGCTTA TCATGCTC  
AAGACGGA AAGACGGA CATACTTC  
AAGGTACA AAGGTACA CCGTTCTA  
ACACAGAA ACACAGAA GCTTCATA  
ACAGCAGA ACAGCAGA CTCTGTGC  
ACCTCCAA ACCTCCAA CCCTTATA  
ACGCTCGA ACGCTCGA ACTGCTCT  
ACGTATCA ACGTATCA CTCTAATC  
ACTATGCA ACTATGCA ACCCTTGC  
AGAGTCAA AGAGTCAA ATCTTAGG  
AGATCGCA AGATCGCA CATGTCTC  
AGCAGGAA AGCAGGAA TCATTGCA  
AGTCACTA AGTCACTA ACACCTTT  
ATCCTGTA ATCCTGTA AATTTCTC  
ATTGAGGA ATTGAGGA ATTCATGG  
CAACCACA CAACCACA ACTTTACC  
GACTAGTA GACTAGTA CTTCTAAC  
CAATGGAA CAATGGAA CTATTTCA  
CACTTCGA CACTTCGA TCTCATGC  
CAGCGTTA CAGCGTTA ATCCTTAC  
CATAACCA CATAACCA TAAATATC  
CCAGTTCA CCAGTTCA TTACCTGC  
CCGAAGTA CCGAAGTA CACTTTCA  
CCGTGAGA CCGTGAGA CACCTTTA  
CCTCCTGA CCTCCTGA CTGACTTC  
CGAACTTA CGAACTTA CATTTGGA  
CGACTGGA CGACTGGA GCTCTACT  
CGCATACA CGCATACA GTTACGTA  
CTCAATGA CTCAATGA CCTGTTGC  
CTGAGCCA CTGAGCCA CTATCATC  
CTGGCATA CTGGCATA GCTATCAT  
GAATCTGA GAATCTGA ACATTCAT  
CAAGACTA CAAGACTA TTCGCTAC  
GAGCTGAA GAGCTGAA CATTCTAC  
GATAGACA GATAGACA CACTTATC  
GCCACATA GCCACATA ATAAGCTC  
GCGAGTAA GCGAGTAA TCATCCTG  
GCTAACGA GCTAACGA CCTGGTAT  
GCTCGGTA GCTCGGTA TGGTATAC  
GGAGAACA GGAGAACA TTGGGAGA  
GGTGCGAA GGTGCGAA ACTTCATC

|          |          |          |
|----------|----------|----------|
| GTACGCAA | GTACGCAA | TCTCTAGC |
| GTCGTAGA | GTCGTAGA | ATGCCCTT |
| GTCTGTCA | GTCTGTCA | CCCAATTT |
| GTGTTCTA | GTGTTCTA | ACTATATA |
| TAGGATGA | TAGGATGA | CTCTATAC |
| TATCAGCA | TATCAGCA | CTGTCTCA |
| TCCGTCTA | TCCGTCTA | GACCTTTC |
| TCTTCACA | TCTTCACA | GATTTGGC |
| TGAAGAGA | TGAAGAGA | CGTCTAGG |
| TGGAACAA | TGGAACAA | TACTCGAA |
| TGGCTTCA | TGGCTTCA | CAGCCTTT |
| TGGTGGTA | TGGTGGTA | CCTCATTA |
| TTCACGCA | TTCACGCA | CTTATACC |
| AACTCACC | AACTCACC | TCTATTAC |
| AAGAGATC | AAGAGATC | CCTGCATT |
| AAGGACAC | AAGGACAC | CAATCCTT |
| AATCCGTC | AATCCGTC | TTGTCTTA |
| AATGTTGC | AATGTTGC | TCACTTTA |
| ACACGACC | ACACGACC | TGCTTGGG |
| ACAGATTC | ACAGATTC | CGCTCATT |
| AGATGTAC | AGATGTAC | GCCTCTAT |
| AGCACCTC | AGCACCTC | GAGCACAA |
| AGCCATGC | AGCCATGC | CTCTTAAC |
| AGGCTAAC | AGGCTAAC | TCTAGGCT |
| ATAGCGAC | ATAGCGAC | AATTCTGC |
| ATCATTCC | ATCATTCC | CATTCTCA |
| ATTGGCTC | ATTGGCTC | ACTTGCCT |
| CAAGGAGC | CAAGGAGC | ATCATTGC |
| CACCTTAC | CACCTTAC | GTTCAACA |
| CCATCCTC | CCATCCTC | CCATTTGC |
| CCGACAAC | CCGACAAC | GACTTTGC |
| CCTAATCC | CCTAATCC | ATTGGCTC |
| CCTCTATC | CCTCTATC | GTGCTAGC |
| CGACACAC | CGACACAC | CTTCAAC  |
| CGGATTGC | CGGATTGC | ACTATTGC |
| CTAAGGTC | CTAAGGTC | ACTGGCTT |
| GAACAGGC | GAACAGGC | ATTAGGCT |
| GACAGTGC | GACAGTGC | GCCTTTCA |
| GAGTTAGC | GAGTTAGC | ATTCTAGG |
| GATGAATC | GATGAATC | CCTTACAT |
| GCCAAGAC | GCCAAGAC | ACATTTGG |
| -        | -        | CATCATCC |
| -        | -        | CTGCTTTG |
| -        | -        | CTAAGGGA |

|   |   |          |
|---|---|----------|
| - | - | GCTTATAG |
| - | - | TCTGATCC |
| - | - | TCTCTTGG |
| - | - | CAATTTCC |
| - | - | AGTCTCTT |
| - | - | TGCTGCTC |
| - | - | GTATTTCC |
| - | - | TTCCTGTG |
| - | - | GCTGCTTC |
| - | - | TATGTGTC |
| - | - | CAATTCTC |
| - | - | TGGTCTCC |
| - | - | GCTCTTTA |
| - | - | GCTGCATG |
| - | - | ACTCATTT |
| - | - | AGTCTTGG |
| - | - | GGTTCTTC |
| - | - | TCATGTTG |
| - | - | ATTTTGCC |
| - | - | CTTCTGTA |
| - | - | GTCCATCT |
| - | - | GCTATCTC |
| - | - | TAGTTTCC |
| - | - | TCCATTAT |
| - | - | AGGATTAA |
| - | - | AATCTTTC |
| - | - | GTCATATG |
| - | - | GTGCTTCC |
| - | - | ATGTGTTG |
| - | - | CCATCTTG |
| - | - | TACTGTCT |
| - | - | TTCATCGC |
| - | - | ACTGTGGG |
| - | - | TCTGTGCC |
| - | - | TCAATCTC |
| - | - | GTCCTCTG |
| - | - | TTACATTC |
| - | - | ATTCTGTC |
| - | - | TGTGTATG |
| - | - | TCCATTTG |
| - | - | TTAGCTTC |
| - | - | GTGCTTGA |
| - | - | GTTTGTGA |
| - | - | GAAATTAG |

|   |   |          |
|---|---|----------|
| - | - | GCAAATTC |
| - | - | GAGGTTGA |
| - | - | CCTGTCTG |
| - | - | GTGGGTTC |
| - | - | TTGCATC  |
| - | - | AGGTAATA |
| - | - | GTGCCTTC |
| - | - | ATGTTTCC |
| - | - | CTTAATTC |
| - | - | TCTGGCTC |
| - | - | CATCATTT |
| - | - | GTTGTCTC |
| - | - | ATCTTCTG |
| - | - | TGTTTGCC |
| - | - | TTCTGTCA |
| - | - | ACGGACTC |
| - | - | TTTGGTCA |
| - | - | TATCCGGG |
| - | - | TGTCATTC |
| - | - | ATTCTCTG |
| - | - | TGGCTTCC |
| - | - | TTGTTGCC |
| - | - | GTCATCTC |
| - | - | TTGCTCAT |
| - | - | CTGTCTGC |
| - | - | TATATTCC |
| - | - | ATATTGGC |
| - | - | GTGTCCTC |
| - | - | ATCTTCAT |
| - | - | CGTGGTTG |
| - | - | TTGCATCC |
| - | - | TCTTAATC |
| - | - | TGCATTTT |
| - | - | GATGTTTC |
| - | - | ATCTTGTC |
| - | - | TCATATTC |
| - | - | TGGCCTCT |
| - | - | CGTTGTCT |
| - | - | TCTTGTC  |
| - | - | TATTCCTG |
| - | - | TCCATGTC |
| - | - | TTGTCATC |
| - | - | ATTCCTG  |
| - | - | GTGTCTCC |

|   |   |          |
|---|---|----------|
| - | - | GTGTGTGT |
| - | - | TATGCTTC |
| - | - | ATGGTGTT |
| - | - | GAATAATG |
| - | - | CCTCTGTG |

**replace.txt:**

This file contains the instructions on how to produce the “modified” count matrix in `output_dir/counts_unfiltered_modified/` – the output directory which contains the combined oligo-dT and random hexamer barcodes wherein the random hexamer barcodes (first column of the file) are converted to their oligo-dT counterparts (second column of the file). These barcodes, being the third component of the barcode, occur at the end of the final barcode string. The asterisk (\*) at the beginning of the replacement string tells bustools to convert the nucleotides at the end of the barcode sequence. As an example, the barcode sequence `AACAACCATGAAGAGACATCATCC` will be converted into `AACAACCATGAAGAGACATTCCTA` in the final output in the `output_dir/counts_unfiltered_modified/` directory.

|          |           |
|----------|-----------|
| CATCATCC | *CATTCCTA |
| CTGCTTTG | *CTTCATCA |
| CTAAGGGA | *CCTATATC |
| GCTTATAG | *ACATTTAC |
| TCTGATCC | *ACTTAGCT |
| TCTCTTGG | *CCAATTCT |
| CAATTTCC | *GCCTATCT |
| AGTCTCTT | *ATGCTGCT |
| TGCTGCTC | *CATTTACA |
| GTATTTCC | *ACTCGTAA |
| TTCCGTGT | *CCTTTGCA |
| GCTGCTTC | *ACTCCTGC |
| TATGTGTC | *ATTTGGCA |
| CAATTCTC | *TTATTCTG |
| TGGTCTCC | *TCATGCTC |
| GCTCTTTA | *CATACTTC |
| GCTGCATG | *CCGTTCTA |
| ACTCATT  | *GCTTCATA |
| AGTCTTGG | *CTCTGTGC |
| GGTTCTTC | *CCCTTATA |
| TCATGTTG | *ACTGCTCT |
| ATTTTGCC | *CTCTAATC |
| CTTCTGTA | *ACCCTTGC |
| GTCCATCT | *ATCTTAGG |



GCTATCTC \*CATGTCTC  
TAGTTTCC \*TCATTGCA  
TCCATTAT \*ACACCTTT  
AGGATTAA \*AATTTCTC  
AATCTTTC \*ATTCATGG  
GTCATATG \*ACTTTACC  
GTGCTTCC \*CTTCTAAC  
ATGTGTTG \*CTATTTCA  
CCATCTTG \*TCTCATGC  
TACTGTCT \*ATCCTTAC  
TTCATCGC \*TAAATATC  
ACTGTGGG \*TTACCTGC  
TCTGTGCC \*CACTTTCA  
TCAATCTC \*CACCTTTA  
GTCCCTCTG \*CTGACTTC  
TTACATTC \*CATTTGGA  
ATTCTGTC \*GCTCTACT  
TGTGTATG \*GTTACGTA  
TCCATTTG \*CCTGTTGC  
TTAGCTTC \*CTATCATC  
GTGCTTGA \*GCTATCAT  
GTTTGTGA \*ACATTCAT  
GAAATTAG \*TTCGCTAC  
GCAAATTC \*CATTCTAC  
GAGGTTGA \*CACTTATC  
CCTGTCTG \*ATAAGCTC  
GTGGGTTT \*TCATCCTG  
TTTGCATC \*CCTGGTAT  
AGGTAATA \*TGGTATAC  
GTGCCCTC \*TTGGGAGA  
ATGTTTCC \*ACTTCATC  
CTTAATTC \*TCTCTAGC  
TCTGGCTC \*ATGCCCTT  
CATCATTT \*CCCAATTT  
GTTGTCTC \*ACTATATA  
ATCTTCTG \*CTCTATAC  
TGTTTGCC \*CTGTCTCA  
TTCTGTCA \*GACCCTTC  
ACGGACTC \*GATTTGGC  
TTTGGTCA \*CGTCTAGG  
TATCCGGG \*TACTCGAA  
TGTCATTC \*CAGCCTTT  
ATTCTCTG \*CCTCATTA  
TGGCTTCC \*CTTATACC

```
TTGTTGCC *TCTATTAC
GTCATCTC *CCTGCATT
TTGCTCAT *CAATCCTT
CTGTCTGC *TTGTCTTA
TATATTCC *TCACTTTA
ATATTGGC *TGCTTGGG
GTGTCCTC *CGCTCATT
ATCTTCAT *GCCTCTAT
CGTGGTTG *GAGCACAA
TTGCATCC *CTCTTAAC
TCTTAATC *TCTAGGCT
TGCATTTT *AATTCTGC
GATGTTTC *CATTCTCA
ATCTTGTC *ACTTGCCT
TCATATTC *ATCATTGC
TGGCCTCT *GTTCAACA
CGTTGTCT *CCATTTGC
TCTTGTC A *GACTTTGC
TATTCCTG *ATTGGCTC
TCCATGTC *GTGCTAGC
TTGTCATC *CTTTCAAC
ATTTCCCTG *ACTATTGC
GTGTCTCC *ACTGGCTT
GTGTGTGT *ATTAGGCT
TATGCTTC *GCCTTTCA
ATGGTGTT *ATTCTAGG
GAATAATG *CCTTACAT
CCTCTGTG *ACATTTGG
```

**The commands run by kb count in this example:**

```
mkdir -p output_dir/tmp

mkdir -p output_dir

kallisto bus -i index.idx -o output_dir -x
1,10,18,1,48,56,1,78,86:1,0,10:0,0,0 -t 8 --fr-stranded
--batch-barcodes --batch batch.txt

bustools sort -o output_dir/tmp/output.s.bus -T output_dir/tmp -t 8
-m 4G output_dir/output.bus
```

```
bustools inspect -o output_dir/inspect.json -w barcodes.txt
output_dir/tmp/output.s.bus

bustools correct -o output_dir/tmp/output.s.c.bus -w barcodes.txt
output_dir/tmp/output.s.bus

bustools sort -o output_dir/output.unfiltered.bus -T output_dir/tmp
-t 8 -m 4G output_dir/tmp/output.s.c.bus

mkdir -p output_dir/counts_unfiltered

bustools count -o output_dir/counts_unfiltered/cells_x_genes -g
t2g.txt -e output_dir/matrix.ec -t output_dir/transcripts.txt -s
nascent.txt --genecounts --umi-gene
output_dir/output.unfiltered.bus

mv output_dir/counts_unfiltered/cells_x_genes.mtx
output_dir/counts_unfiltered/cells_x_genes.mature.mtx

mv output_dir/counts_unfiltered/cells_x_genes.2.mtx
output_dir/counts_unfiltered/cells_x_genes.nascent.mtx

bustools correct -o output_dir/tmp/output.unfiltered.c.bus -w
replace.txt output_dir/output.unfiltered.bus --replace
bustools sort -o output_dir/output_modified.unfiltered.bus -T
output_dir/tmp -t 8 -m 4G output_dir/tmp/output.unfiltered.c.bus

mkdir -p output_dir/counts_unfiltered_modified

bustools count -o
output_dir/counts_unfiltered_modified/cells_x_genes -g t2g.txt -e
output_dir/matrix.ec -t output_dir/transcripts.txt -s nascent.txt
--genecounts --umi-gene output_dir/output_modified.unfiltered.bus

mv output_dir/counts_unfiltered_modified/cells_x_genes.mtx
output_dir/counts_unfiltered_modified/cells_x_genes.mature.mtx

mv output_dir/counts_unfiltered_modified/cells_x_genes.2.mtx
output_dir/counts_unfiltered_modified/cells_x_genes.nascent.mtx

rm -rf output_dir/tmp
```
